# Supplementary material
Source: publisher figshare collection journal article supplement (https://brill.figshare.com/articles/dataset/_/11109026)
Supplement: Supplementary file 1 [file 1]

## Sheet: Appendix
Voucher	Longitude	Latitude	Country	Department	Locality	Sex	SVL (mm)	yellow% on ROI	yellow% on gr	yellow% on ch	yellow% on b	yellow% on s	ROI - mean intensity	gr - mean intensity	ch - mean intensity	b - mean intensity	s - mean intensity
IIBP-H 5359	-60.3283	-22.3459	Paraguay	Boquerón	Fortín Toledo	female	15.447	0.0788276	0.719178	0.177875	0.0677393	0.045547	143.049	143.3	142.404	141.299	142.128
IIBP-H 5360	-60.3283	-22.3459	Paraguay	Boquerón	Fortín Toledo	male	14.179	0.137946	0.766697	0.201972	0.0181914	0.039768	143.525	143.878	142.42	141.217	141.931
IIBP-H 5361	-60.3283	-22.3459	Paraguay	Boquerón	Fortín Toledo	female	12.18	0.13264	0.583318	0.314225	1.2222	0.0615875	142.486	142.46	142.411	145.237	142.369
IIBP-H 5362	-60.3283	-22.3459	Paraguay	Boquerón	Fortín Toledo	male	13.738	0.158349	0.487835	0.233334	0.181443	0.136856	143.56	143.906	143.242	142.631	143.562
IIBP-H 5363	-60.3283	-22.3459	Paraguay	Boquerón	Fortín Toledo	male	16.421	0.140284	0.72517	0.19536	0.0476311	0.0350261	144.536	144.825	144.219	142.274	143.307
IIBP-H 5364	-60.3283	-22.3459	Paraguay	Boquerón	Fortín Toledo	male	18.835	0.258402	0.50157	0.234674	0.0948652	0.170911	146.298	147.551	144.778	143.894	146.014
IIBP-H 5365	-60.3283	-22.3459	Paraguay	Boquerón	Fortín Toledo	male	20.49	0.170284	0.492009	0.131658	0.0256529	0.35658	144.378	144.602	143.911	142.033	144.397
IIBP-H 5366	-60.3283	-22.3459	Paraguay	Boquerón	Fortín Toledo	female	20.2424	0.238478	0.530536	0.182237	0.065214	0.225551	144.909	145.226	144.028	143.304	145.343
IIBP-H 5367	-60.3283	-22.3459	Paraguay	Boquerón	Fortín Toledo	female	19.708	0.283491	0.557394	0.164898	0.0254809	0.255516	149.348	148.899	146.166	142.688	153.04
IIBP-H 5368	-60.3283	-22.3459	Paraguay	Boquerón	Fortín Toledo	male	19.721	0.378057	0.451804	0.111962	0.0307079	0.337552	151.801	147.705	145.927	146.003	159.749
IIBP-H 5369	-60.3283	-22.3459	Paraguay	Boquerón	Fortín Toledo	male	17.863	0.277834	0.427014	0.143282	0.152227	0.283992	144.862	144.445	145.023	144.151	145.847
IIBP-H 5370	-60.3283	-22.3459	Paraguay	Boquerón	Fortín Toledo	male	20.356	0.224277	0.5774	0.149386	0.0252379	0.253858	145.457	146.246	143.682	142.44	145.017
IIBP-H 5371	-60.3283	-22.3459	Paraguay	Boquerón	Fortín Toledo	male	19.461	0.172511	0.568169	0.110015	0.0834008	0.240225	144.227	143.391	143.511	143.382	146.818
IIBP-H 5372	-60.3283	-22.3459	Paraguay	Boquerón	Fortín Toledo	female	22.337	0.213324	0.634821	0.118399	0.01758	0.237926	146.486	146.49	146.535	141.899	146.817
IIBP-H 5373	-60.3283	-22.3459	Paraguay	Boquerón	Fortín Toledo	female	23.13	0.219209	0.439019	0.163264	0.0623588	0.347665	147.961	145.842	144.236	142.5	153.514
IIBP-H 5374	-60.3283	-22.3459	Paraguay	Boquerón	Fortín Toledo	male	19.995	0.144651	0.579561	0.164099	0.0584888	0.199627	144.98	145.586	143.99	142.718	144.686
IIBP-H 5375	-60.3283	-22.3459	Paraguay	Boquerón	Fortín Toledo	male	19.325	0.241998	0.614021	0.184821	0.0192779	0.187637	149.44	149.88	148.75	143.253	149.357
IIBP-H 5376	-60.3283	-22.3459	Paraguay	Boquerón	Fortín Toledo	female	27.522	0.403639	0.368222	0.330232	0.0324101	0.271873	157.311	156.332	151.835	144.719	166.769
IIBP-H 5377	-60.3283	-22.3459	Paraguay	Boquerón	Fortín Toledo	female	21.34	0.122195	0.639479	0.16423	0.0451261	0.1508	145.013	145.879	143.779	142.906	143.319
IIBP-H 5378	-60.3283	-22.3459	Paraguay	Boquerón	Fortín Toledo	female	20.982	0.162492	0.676182	0.206936	0.0216992	0.0950486	145.783	146.797	144.18	142.23	142.889
IIBP-H 5379	-60.3283	-22.3459	Paraguay	Boquerón	Fortín Toledo	male	22.753	0.418996	0.427725	0.303782	0.00853936	0.261877	159.143	163.307	151.634	145.754	161.48
IIBP-H 5380	-60.3283	-22.3459	Paraguay	Boquerón	Fortín Toledo	male	19.685	0.122837	0.668996	0.158527	0.0968028	0.0805829	144.066	144.633	143.31	142.369	142.903
IIBP-H 5381	-60.3283	-22.3459	Paraguay	Boquerón	Fortín Toledo	female	25.399	0.188685	0.707457	0.0782399	9.88e-05	0.219153	152.622	152.569	147.175	142.341	154.668
IIBP-H 5382	-60.3283	-22.3459	Paraguay	Boquerón	Fortín Toledo	female	26.798	0.366383	0.496735	0.133225	0.0270855	0.345258	161.068	161.659	151.378	147.083	165.019
IIBP-H 5383	-60.3283	-22.3459	Paraguay	Boquerón	Fortín Toledo	female	21.297	0.250227	0.427287	0.117681	0.0575551	0.401895	146.272	146.198	145.136	142.692	147.198
IIBP-H 5384	-60.3283	-22.3459	Paraguay	Boquerón	Fortín Toledo	female	26.211	0.376662	0.45951	0.220865	0.0157915	0.310444	160.751	167.984	148.694	144.065	159.284
IIBP-H 5385	-60.3283	-22.3459	Paraguay	Boquerón	Fortín Toledo	female	23.364	0.303399	0.547629	0.137405	0.145138	0.170919	147.268	149.236	145.476	142.379	146.546
IIBP-H 5387	-60.3283	-22.3459	Paraguay	Boquerón	Fortín Toledo	male	21.683	0.310279	0.523482	0.138382	0.114354	0.225805	150.386	155.219	145.412	142.869	146.004
IIBP-H 5388	-60.3283	-22.3459	Paraguay	Boquerón	Fortín Toledo	female	28.187	0.193717	0.702733	0.0566643	0.000396541	0.242615	158.19	161.281	147.276	141.55	151.711
IIBP-H 5389	-60.3283	-22.3459	Paraguay	Boquerón	Fortín Toledo	female	27.192	0.396606	0.394365	0.416295	0.0201242	0.309159	158.587	178.976	158.489	155.074	169.887
IIBP-H 5412	-58.9915	-23.3997	Paraguay	Presidente Hayes	Ruta N° 9 - Transchaco, tramo Pozo Colorado - Río Verde	male	25.287	0.432935	0.409651	0.303941	0.0546332	0.232436	151.806	166.373	157.107	150.681	175.006
IIBP-H 5413	-59.205	-23.1368	Paraguay	Presidente Hayes	Ruta N° 9 - Transchaco, tramo Pozo Colorado - Río Verde	male	23.169	0.436269	0.306788	0.295262	0.162847	0.247144	147.624	153.181	145.203	143.506	146.431
IIBP-H 5414	-59.205	-23.1368	Paraguay	Presidente Hayes	Ruta N° 9 - Transchaco, tramo Pozo Colorado - Río Verde	male	25.976	0.490369	0.271081	0.478103	0.0426987	0.213053	162.544	165.118	162.45	149.268	162.091
IIBP-H 5415	-59.205	-23.1368	Paraguay	Presidente Hayes	Ruta N° 9 - Transchaco, tramo Pozo Colorado - Río Verde	male	21.72	0.528885	0.373986	0.328919	0.10968	0.191226	154.759	156.804	151.497	150.936	158.565
IIBP-H 5497	-60.5726	-21.6813	Paraguay	Boquerón	Mariscal Estigarribia, Hotel Aeropuerto	female	23.246	0.225053	0.48727	0.159749	0.0514807	0.303844	149.874	149.844	148.342	142.585	151.942
IIBP-H 5498	-60.5726	-21.6813	Paraguay	Boquerón	Mariscal Estigarribia, Hotel Aeropuerto	male	23.034	0.336565	0.259208	0.494285	0.0420015	0.271163	152.305	152.05	151.636	145.062	154.942
IIBP-H 5500	-60.5726	-21.6813	Paraguay	Boquerón	Mariscal Estigarribia, Hotel Aeropuerto	female	21.897	0.148727	0.465504	0.148078	0.0529213	0.337334	146.257	146.783	145.408	142.671	147.417
IIBP-H 5501	-60.5776	-21.7785	Paraguay	Boquerón	Mariscal Estigarribia, Hotel Aeropuerto	female	25.551	0.129287	0.269603	0.251521	0.120829	0.356894	145.93	145.045	146.544	142.681	147.211
IIBP-H 5502	-60.5755	-21.7397	Paraguay	Boquerón	Mariscal Estigarribia, Hotel Aeropuerto	female	24.866	0.27116	0.157562	0.142918	0.0179829	0.310096	150.85	145.045	145.815	144.786	157.03
