# Supplementary material
Source: publisher figshare collection journal article supplement (https://brill.figshare.com/articles/dataset/_/11109026)
Supplement: Supplementary file 1 [file 1]

Ontogenetic changes in the ventral colouration of post  
metamorphic *Elachistocleis haroi* Pereyra, Akmentins, Laufer,  
Vaira, 2013 (Anura: Microhylidae)

Diego Bueno-Villafañe<sup>1\*</sup>, Andrea Caballero-Gini<sup>1</sup>, Marcela Ferreira<sup>1</sup>, Flavia Netto<sup>1,2</sup>,

Danilo Fernández-Ríos<sup>3</sup>, Francisco Brusquetti<sup>1</sup>

1 - Instituto de Investigación Biológica del Paraguay, Del Escudo 1607, Asunción, Paraguay

2 - Itaipú Binacional, División de Áreas Protegidas, Dirección de Coordinación Ejecutiva, Av. Monseñor  
Rodríguez 150, Ciudad del Este, Alto Paraná, Paraguay

3 - Universidad Nacional de Asunción, Facultad de Ciencias Exactas y Naturales, Campus de la UNA,  
Escuela Agrícola Mariscal López, San Lorenzo, Paraguay

\*Corresponding author; e-mail: [diegobuenov@gmail.com](mailto:diegobuenov@gmail.com)
